1  
2  
3  
4  
5  
6  
7  
8  
9  
10  
11  
12  
13  
14  
15  
16  
17  
18  
19  
20  
21  
22

**Visualization of conformational changes and membrane remodeling leading to  
genome delivery by viral class-II fusion machinery**

Vidya Mangala Prasad<sup>1</sup>¥, Jelle S. Blijleven<sup>2</sup>, Jolanda M. Smit<sup>3</sup>, Kelly K. Lee<sup>1,4,5\*</sup>

Affiliations:

1. Department of Medicinal Chemistry, University of Washington, Seattle, WA 98195, USA.
2. Zernike Institute for Advanced Materials, University of Groningen, Groningen, The Netherlands.
3. Department of Medical Microbiology and Infection Prevention, University of Groningen, University Medical Center Groningen, Groningen, The Netherlands.
4. Biological Physics, Structure and Design Graduate Program, University of Washington, Seattle, WA 98195, USA.
5. Department of Microbiology, University of Washington, Seattle, WA 98195, USA.

¥Current Address: Molecular Biophysics Unit, Indian Institute of Science, Bengaluru 560012, Karnataka, India.

\*Correspondence to: [kklee@uw.edu](mailto:kklee@uw.edu)

23 **Abstract:**

24 Chikungunya virus (CHIKV) is a human pathogen that delivers its genome to the host cell  
25 cytoplasm through endocytic low pH-activated membrane fusion mediated by class-II fusion  
26 proteins. Though structures of prefusion, icosahedral CHIKV are available, structural  
27 characterization of virion interaction with membranes has been limited. Here, we have used cryo-  
28 electron tomography to visualize CHIKV's complete membrane fusion pathway, identifying key  
29 intermediary glycoprotein conformations coupled to membrane remodeling events. Using sub-  
30 tomogram averaging, we elucidate features of the low pH-exposed virion, nucleocapsid and full-  
31 length E1-glycoprotein's post-fusion structure. Contrary to class-I fusion systems, CHIKV  
32 achieves membrane apposition by protrusion of extended E1-glycoprotein homotrimers into the  
33 target membrane. The fusion process also features a large hemifusion diaphragm that transitions  
34 to a wide pore for intact nucleocapsid delivery. Our analyses provide comprehensive ultrastructural  
35 insights into the class-II virus fusion system function and direct mechanistic characterization of  
36 the fundamental process of protein-mediated membrane fusion.

37

38

39 **Introduction:**

40 Chikungunya virus (CHIKV) is a mosquito-borne human pathogen that has caused major  
41 outbreaks in Europe, Asia and the Americas<sup>1; 2</sup>. It is a member of the alphavirus genus in the  
42 *Togaviridae* family<sup>3</sup>. Along with other members including Ross River virus, Semliki Forest virus,  
43 Sindbis virus and Venezuelan equine encephalitis virus, alphaviruses are responsible for severe  
44 emerging diseases in humans and animals<sup>1; 4; 5</sup>. CHIKV infections are characterized by high fever,  
45 fatigue, joint and muscle pains, with serious long-term effects including debilitating  
46 polyarthralgia<sup>6; 7</sup>. Despite its medical importance, no vaccines or antivirals against any alphavirus  
47 is currently available<sup>8; 9</sup>.

48 CHIKV, like all alphaviruses, is a membrane-enveloped, single-stranded, positive-sense  
49 RNA virus with an ~11.8kb genome<sup>3; 10</sup>. The mature CHIKV virion is composed of an icosahedral  
50 inner nucleocapsid containing 240 capsid monomers that enclose the viral genome<sup>11</sup>. The  
51 nucleocapsid is surrounded by a membrane bilayer. The external surface of the mature virus  
52 contains 240 copies of E1 and E2 membrane-anchored glycoprotein heterodimers, arranged as 80  
53 trimeric spikes following icosahedral symmetry<sup>3; 10; 11</sup> (Figure 1a-c). E2 is primarily responsible  
54 for cellular receptor attachment<sup>12; 13</sup> but also interacts non-covalently with the nucleocapsid to  
55 stabilize the virion structure<sup>14</sup>. The E1 glycoprotein contains the hydrophobic fusion loop (FL)  
56 and mediates membrane fusion<sup>15; 16</sup>. In the mature virion, E2 is positioned above E1, shielding the  
57 functionally critical FL from premature exposure<sup>11; 17</sup> (Figure 1b,c).

58 CHIKV enters host cells primarily via clathrin-mediated endocytosis<sup>18</sup> following  
59 attachment to a cellular receptor such as MxRA8<sup>19</sup> or other attachment factors such as heparan  
60 sulfate or C-type lectins<sup>20</sup>. Upon cellular entry, the virus is engulfed into endosomes where the low  
61 pH environment resulting from endosomal maturation triggers conformational changes on the

62 virus surface including the dissociation of the E1-E2 heterodimer<sup>21</sup> and the formation of extended  
63 E1 homotrimers (HT) with its FLs inserted into the target membrane<sup>22; 23</sup> (Figure 1d,e). The E1-  
64 HTs are then thought to drive membrane fusion by refolding/hairpin formation to bring the  
65 opposing membranes together<sup>22</sup>. Lipid mixing between the viral and endosomal membrane results  
66 in fusion pore formation that allows delivery of the viral nucleocapsid into the cytoplasm where it  
67 subsequently disassembles to release the viral RNA and establish infection<sup>24; 25</sup>.

68         The current model for how alphavirus membrane fusion takes place is primarily based on  
69 x-ray crystallographic structures of the pre-fusion<sup>26</sup> and post-fusion conformations of recombinant  
70 E1 glycoprotein ectodomains<sup>22</sup> along with related molecular studies on isolated glycoproteins<sup>23; 27</sup>.  
71 We lack direct structural data describing the sequence of protein conformational changes and  
72 nature of membrane remodeling that is necessary to derive a mechanistic understanding of the  
73 fusion process for alphaviruses and, more broadly, the type of fusion system (class-II) they  
74 represent<sup>28</sup>.

75         Here, we have used cryo-electron tomography (cryo-ET) in combination with sub-  
76 tomogram averaging to trap and observe the membrane fusion process in CHIKV under near-  
77 native conditions. Through stepwise analysis of CHIKV interactions with a target membrane at  
78 varying pH values and reaction timepoints, we can clearly demarcate intermediate stages in  
79 CHIKV membrane fusion. These data provide comprehensive insights into changes in virion  
80 structure, glycoprotein conformations, and changes in membrane organization along the fusion  
81 pathway. Our results also demonstrate that membrane fusion mediated by class-II fusion proteins  
82 in CHIKV proceeds by a markedly different pathway relative to class-I viral fusion systems such  
83 as influenza virus<sup>29; 30; 31; 32</sup>. Furthermore, our results highlight the power of cryo-ET for capturing  
84 3-dimensional snapshots of reaction intermediates in a dynamic biological process from start to



85 finish.

86

87 **Results:**

88 For our experiments, CHIKV (strain S27) particles were rendered replication incompetent  
89 by UV-light inactivation. The UV-treated virus drives membrane fusion in a similar fashion to  
90 untreated virus<sup>33</sup>. Single particle cryo-EM reconstruction of the UV-treated CHIKV was calculated  
91 to a resolution of 6.75 Å, which confirmed that the virion structure at neutral pH is identical to  
92 reported CHIKV structures<sup>11; 19</sup> (Figure 1a, Supplementary Figure 1).

93 CHIKV particles were mixed with liposomes at varying pH conditions and incubated for a  
94 range of time points prior to plunge freezing in liquid ethane. Liposomes were prepared based on  
95 previous reports for optimal fusion in CHIKV<sup>33</sup>. At pH 6.5 and below, rapid aggregation of CHIKV  
96 particles was observed, hence, optimization of the ratio of liposomes to CHIKV was performed to  
97 reduce aggregation. The pH threshold for CHIKV S27 fusion is 6.2 with optimal fusion occurring  
98 in the pH range of 4.5-5.6<sup>33</sup>. Within this range, most particles carry out fusion within 10 seconds  
99 of exposure to low pH at 37 °C<sup>33</sup>, exhibiting similar kinetics to other alphaviruses<sup>34; 35</sup>. To better  
100 sample and capture intermediate fusion stages within the constraints of cryo-EM grid preparation  
101 conditions, membrane fusion experiments were performed at room temperature, which slows the  
102 fusion reaction.

103 At pH values above 6.0, CHIKV particles associated with liposomes via discrete densities  
104 bridging the virus-liposome interface (Supplementary Figure 2). However, interactions beyond the  
105 initial virus-liposome association were rarely observed even at longer incubation periods of ~30  
106 minutes. Indeed, even in fluorescence studies, the extent of fusion events observed at pH 6.0 and  
107 above was negligible<sup>33</sup>. We observed a clear progression to completion of fusion only at pH values

108 below 6.0. At pH  $\leq 5.0$ , even at room temperature, most virions in the population completed the  
109 membrane fusion process within 15 seconds. Thus, for better sampling of fusion events, pH values  
110 in the intermediate range including 5.9, 5.6 and 5.1 were examined. Across these pH values, the  
111 observed intermediates are similar, except that at lower pH, a more rapid progression through steps  
112 leading to complete fusion was observed. From analysis of more than six hundred CHIKV-  
113 liposome complexes in our tomograms, CHIKV-mediated membrane fusion stages could be  
114 categorized into nine distinct steps, which are discussed in detail below.

115

#### 116 Stage I - Membrane recruitment:

117 Initial membrane recruitment can be observed between 30 seconds-1 minute at pH 6.1 and  
118 5.9, and within 30 seconds at pH 5.6. Minute, localized attachments are observed, sparsely  
119 bridging the CHIKV glycoprotein exterior to the liposomes, with the glycoprotein shell appearing  
120 relatively intact (Figure 2a-c, Supplementary Video 1). From analysis of more than one hundred  
121 such interactions, the lengths of the delicate attachments extending from the viral glycoprotein  
122 surface to the liposome surface were observed to be  $\sim 32-45$  Å. At neutral pH on the virus surface,  
123 the E2 B domain protects the E1-FL from solvent exposure<sup>11</sup> (Figure 1b), but under low pH  
124 conditions, the B domain has been reported to exhibit increased flexibility resulting in E1-FL  
125 exposure and potential for membrane binding<sup>17, 36</sup>. The fine attachments seen in the tomograms  
126 (Figure 2a-c) thus likely reflect a state in which the tip of individual E1s containing the FL have  
127 inserted into membrane, but without global disruption of the trimeric E1-E2 arrangement on the  
128 virus surface (Figure 2d).

129 While the CHIKV surface appeared globally intact, sub-tomogram averaging of low pH  
130 ( $<6.0$ ) exposed CHIKV particles that were isolated or weakly attached to target membranes,

131 showed that the virions have deviated from their global icosahedrally symmetrical organization  
132 (Supplementary Figure 3D). Due to the low number of particles available, it was not possible to  
133 determine whether the virions retained local symmetry features. Comparison of 2D radial density  
134 plots of neutral pH CHIKV with the sub-tomogram averaged low pH CHIKV structure showed  
135 that the outer glycoprotein shell in low pH CHIKV had expanded by  $\sim 20$  Å relative to neutral pH  
136 CHIKV (Supplementary Figure 3).

137

### 138 Stage II - Membrane attachment:

139 The next stage of glycoprotein engagement with the target membrane is accompanied by a  
140 transition of E1 from its orientation parallel to the virus surface to a more perpendicular orientation  
141 with respect to the surface. This stage occurred by 1 minute at pH 5.9, by 30 seconds at pH 5.6  
142 and almost instantaneously at pH 5.1.

143 In  $\sim 2\%$  of examples of CHIKV at early time points, singular, hyper-extended glycoprotein  
144 density was seen interacting with the target liposome. The connecting density in these cases were  
145  $\sim 170$  Å -  $250$  Å as measured from the viral membrane surface to the liposomal membrane (Figure  
146 2e). In contrast, crystal structures of the E1 ectodomain in its pre-fusion and post-fusion  
147 conformations have a length of only  $\sim 125$  Å<sup>26</sup> and  $\sim 100$  Å<sup>22</sup> respectively (Figure 1b,d). Thus, these  
148 extended connections are only feasible with major changes in the E1 structure involving  
149 hyperextension and repositioning of component domains. This also suggests that the energy  
150 needed to detach E1 from the target membrane is larger than that required to partially unravel the  
151 E1 subunit.

152 More commonly at this stage, extensions of clustered glycoprotein density and formation  
153 of multiple robust attachments were observed between the glycoproteins and the liposomes at the

154 interaction interface (Figure 3a-c, Supplementary Video 2). For virion facets that were not  
155 interacting with membranes, heterogeneity in glycoprotein organization was evident on the particle  
156 exterior. From analysis of 221 interaction sites, consisting of multiple glycoprotein attachments to  
157 liposomes, the length of these connecting densities ranged between 90 Å to 165 Å on central  
158 tomogram slices (perpendicular to electron beam direction), as measured from the viral membrane  
159 surface to the target membrane. Corroborating our observations, long, bridge-like densities,  
160 attributed to the E1 protein, have been imaged previously in an early-stage fusion intermediate of  
161 Sindbis virus in contact with liposomes<sup>37</sup>. Furthermore, in our tomograms, residual protein density  
162 was seen close to the viral membrane at the virus-liposome interface (Figure 3a-c) suggesting that  
163 the E2 proteins may still be present at the particle-liposome interface, similar to that seen with  
164 Sindbis virus<sup>37</sup>. The observed multiple attachments between E1 and liposome membrane appear to  
165 set the stage for further steps that involve concerted action of multiple E1 proteins.

166

167 Stage III – E1 homotrimer (HT) formation:

168       Once multiple attachments between E1 and target membrane have formed, the E1  
169 glycoproteins at the virus-target membrane interface transition to form thick, cone-like densities  
170 that are perpendicular to the viral and target membrane planes (Figure 3e-g, I, Supplementary  
171 Video 3). These features (Figure 3e-g) are similar in shape to the known crystal structures of post-  
172 fusion E1 trimers (Figure 1d,e) suggesting that the E1 proteins have oligomerized at this stage to  
173 a form of E1 homotrimers (HT). Four to five E1-HTs can be identified clustered at a given virus-  
174 liposome interface (Figure 3e-g). The E2 proteins appear to have been displaced from the virus-  
175 liposome interface to allow E1 trimerization. E1-HTs were observed by 2 minutes at pH 5.9 as  
176 well as pH 5.6 and by 30 seconds-1 minute at pH 5.1.

177           At the resolution of our cryo-ET data, it is not possible to directly discern whether swapping  
178 of domains I and III of E1, as seen in the crystal structures of post-fusion E1 ectodomain trimers  
179 <sup>22</sup>, has occurred. The lengths of E1-HTs in our tomograms are ~130-150 Å whereas the length of  
180 the post-fusion E1-trimers from crystal structures measures ~100 Å (Figure 1d). The E1-domain  
181 III is ~30Å in dimension. The cryo-ET data, thus, indicate that the domain III of E1 has likely not  
182 folded back to produce the post-fusion conformation at this stage. Our inference regarding this  
183 extended E1-HT state is supported by the identification of a pre-fusion intermediate form of E1-  
184 HT in previous molecular studies with Semliki Forest virus and Sindbis viruses<sup>27; 35</sup>.

185

186 Stage IV - E1-HT membrane insertion:

187           Once extended E1-HT formation occurs, the trimer appears to drive through the target  
188 membrane, causing depressions and possibly small punctures to the target membrane integrity  
189 (Figure 4a-e, Supplementary Video 3,4). This stage of E1-HT membrane insertion can be observed  
190 by 2-5 minutes at pH 5.6 and by 30 seconds-1 minute at pH 5.1. Supporting our observations,  
191 insertion of purified low pH-induced E1 homotrimers (full-length and ectodomain) into liposomal  
192 membranes has been previously reported <sup>22; 38</sup>. Exact measurements of glycoprotein length in this  
193 stage were challenging owing to interference from surrounding membrane density. However, in  
194 cases where measurements could be made, such as in examples shown in Figure 4b-d, the E1-HT  
195 length varied from 110-150Å suggesting that complete folding-back of E1-domain III had still not  
196 occurred. In our cryo-ET data, we also observe examples of neighboring glycoprotein densities  
197 attaching to the target membrane (Figure 4b-d). With increasing numbers of glycoprotein  
198 attachments to the target membrane, the membrane is pulled towards the virion and can be  
199 observed to follow the contours of the virion exterior (Figure 4b-d). Projection of E1-HT into the

200 target membrane at these closely packed interfaces appears to be responsible for bringing the target  
201 membrane close to the viral membrane.

202

203 Stage V and VI - Opposing membrane superposition:

204 In similar timepoints as E1-HT membrane insertion, opposing membrane superposition  
205 was also observed. As the membrane-inserted conformation of E1-HTs are not a favorable  
206 condition for the predominantly surface exposed E1 proteins, we deduce that the E1-HTs likely  
207 are driven away from the virus-liposome interface, resulting in their exclusion from the contact  
208 zone, which instead contains the two membranes in close proximity to each other with only an ~1  
209 nm gap between the proximal leaflets (Figure 4f-i, Supplementary Video 5).

210 At these intermediate stages, starting from the stage of extended E1-HT formation, we  
211 observe glycoproteins being displaced laterally on the virion surface (Figure 4f,g). This indicates  
212 that the cytoplasmic tails of the E2 glycoproteins have been uncoupled from the internal  
213 nucleocapsid, affording them mobility that is restricted in prefusion CHIKV and early fusion  
214 stages. In a few cases, a larger gap between the nucleocapsid and viral membrane is seen (Figure  
215 4f,g) with the nucleocapsid no longer juxtaposed against the inner side of the viral membrane.

216 At this stage, we concurrently also observed cases where the viral and target membrane  
217 bilayers were tightly docked together, such that the individual proximal leaflets were  
218 indistinguishable at the resolution of our tomograms, resulting in a distinct 3-layer membrane  
219 interface (Figure 4j-l, Supplementary Video 6). Such a configuration requires dehydration of the  
220 proximal leaflets to permit close approach and meshing of the polar headgroups<sup>39</sup>. Most likely the  
221 energy released from the surrounding glycoprotein activity is transduced into formation of this  
222 lipidic organization<sup>40</sup>. Similar tightly-docked membrane-membrane contacts have been reported

223 previously as an intermediate during membrane fusion by influenza virus<sup>30</sup> and intracellular  
224 SNARE proteins<sup>39</sup>.

225

226 Stage VII - Hemifusion:

227         Following the formation of tightly juxtaposed membrane interfaces, we next observe clear  
228 examples of merged outer leaflets of the viral and liposomal membranes, corresponding to  
229 hemifused membranes (Figure 5a,b, Supplementary Video 7). This stage is observed at 5 minutes  
230 at pH 5.6 and by 3 minutes at pH 5.1. It is possible that target-membrane insertion of E1-HTs  
231 followed by movement of E1-HTs away from the interface causes enough perturbation or strains  
232 in the membrane to encourage lipid mixing and merging of the proximal leaflets. At the junction  
233 between the viral and target membranes, we observed clear examples of E1-homotrimers that  
234 measure  $\sim 100 \text{ \AA}$  (Fig. 5a), consistent with the size and shape of post-fusion E1 trimers<sup>22</sup>. This  
235 indicates that by the hemifusion stage, the extended E1-HTs have transitioned completely, with  
236 domain III folded back, to form post-fusion E1 trimers, driving tight membrane apposition and  
237 hemifusion.

238         Remarkably, the hemifusion diaphragm in CHIKV membrane fusion is quite large. In cases  
239 where this interface was resolved clearly in all directions, the diaphragm appeared almost circular  
240 with an average diameter of  $350 \text{ \AA}$ , which is nearly half the CHIKV diameter (Figure 5c). In  
241 general, hemifusion diaphragms ranged from half to full diameter of CHIKV, making them  
242 comparable in size to the nucleocapsid that needs to be delivered once the fusion pore forms  
243 (Figure 5a).

244

245

246

247 Stage VIII – Fusion pore formation:

248 Hemifusion in CHIKV progresses with disintegration of the hemifusion diaphragm,  
249 leading to formation of a fusion pore (Figure 5d,e; Supplementary Video 8). This stage is observed  
250 by 5 minutes at pH 5.6 and 3 minutes at pH 5.1. In agreement with the large hemifusion  
251 diaphragms, the fusion pore in CHIKV also exhibit widths >75% of the virion diameter (Figure  
252 5d).

253

254 Stage IX – Release of intact nucleocapsid:

255 The last step of membrane fusion is the release of the CHIKV nucleocapsid (NC) into the  
256 liposome lumen. We observed more than 150 instances of NC released into the liposomal lumen  
257 and all of them appeared intact (Figure 5f,g; Supplementary Video 9). Nevertheless, the released  
258 NCs had lost icosahedral symmetry, as confirmed by our sub-tomogram averaging attempts of  
259 intact NCs. The presence of intact cores after membrane fusion confirm that further interaction  
260 with cellular host factors, such as the large ribosomal subunit <sup>24</sup>, is required for nucleocapsid  
261 disassembly and release of the viral genome. The loss of icosahedral symmetry in the intact NCs  
262 further substantiates conformational changes in its structure as has been proposed previously to be  
263 necessary for exposing interaction sites that facilitate NC disassembly <sup>25</sup>.

264 In the timepoints where membrane fusion has been completed and the intact NCs have  
265 been released into the liposome lumen, distinct protein densities decorate the exterior of fused  
266 liposomes (Figure 5f, Supplementary Video 9). These protein subunits originate at the virus-  
267 liposome fusion interface and are distributed across the entire fused liposome (Figure 5f). From  
268 top-down views of fused liposome surfaces in our tomograms, the protein subunits appear trimeric



269 (Figure 5g). Sub-volumes of these protein subunits were extracted from the cryo-electron  
270 tomograms and subjected to sub-tomogram averaging. The resolution of the averaged structure is  
271 27.2 Å at 0.5 FSC (Fourier Shell Correlation) cutoff (Supplementary Figure 4). The crystal  
272 structure of the post-fusion E1 homotrimer from Semliki Forest Virus (SFV) (PDB ID:1RER) fits  
273 in a unique orientation into the density map (Figure 5h), confirming that these protein subunits are  
274 indeed the post-fusion E1-trimers. Fitting the E1 ectodomain crystal structure into the density map  
275 shows that insertion of the E1 trimer into the outer membrane leaflet is only mediated by its FL  
276 without embedding additional regions of the ectodomain (Figure 5h). Moreover, no extra density  
277 is left to accommodate the E2 protein. These observations indicate that during and after membrane  
278 fusion, the E2 proteins do not form any oligomeric conformations and likely remain as individual  
279 protein subunits diffused across the membrane surface<sup>21</sup>.

280

281 Other effects of low pH on CHIKV:

282 At longer timepoints of pH 5.6 and 5.1, CHIKV can be often observed to undergo  
283 membrane fusion steps as a cluster of aggregated virions (Supplementary Figure 5a). Virions fused  
284 with each other suggesting that membrane attachment of E1 is non-specific (Supplementary Figure  
285 5b). Furthermore, instances where one virion facilitated attachment and membrane fusion of an  
286 adjacent virion were also observed (Supplementary Figure 5a). Instances where CHIKV particles  
287 released NCs into the solution without any interaction with liposomes were also seen  
288 (Supplementary Figure 5b), suggesting that the CHIKV virion becomes increasingly unstable with  
289 decreasing pH.

290

291

292 **Discussion:**

293 Protein-mediated membrane fusion is a critical step in enveloped virus infection and a  
294 fundamental process that underpins many cellular functions. For viruses that employ class-II  
295 fusion proteins, such as flavi- and alphaviruses, virion architectures and structures of the pre- and  
296 post-fusion glycoprotein ectodomains are well established<sup>28; 41</sup>. However, as with most protein-  
297 mediated fusion systems, it has been challenging to obtain detailed structural information that  
298 describes the sequence of events that occur during membrane fusion in the context of the functional  
299 virion. Here, using cryo-ET, we have imaged the steps that an alphavirus must traverse during  
300 cellular entry under near physiological conditions. This approach has enabled us to identify  
301 multiple stages in the fusion process that were previously uncharacterized. By tracking the relative  
302 frequency of observed states at different time points (Figure 6a), the sequence of events leading to  
303 fusion and final release of the nucleocapsid was inferred (Figure 6b).

304 Whereas class-I viral fusion proteins (such as influenza HA) adopt a trimeric prefusion  
305 conformation, class-II proteins in alpha- and flaviviruses are arrayed as symmetrically organized  
306 heterodimers and dimers on the prefusion virion<sup>28; 40; 41</sup>. Despite extensive quaternary interactions  
307 between E1 and E2 across the icosahedrally organized virion surface, the CHIKV E1 glycoproteins  
308 appear to be individually activated under the effect of low pH and membrane availability. This is  
309 similar to the case in influenza virus in which individual HA activate independently and adopt  
310 dynamic intermediate conformations<sup>42</sup>.

311 In our cryo-ET data, E1 monomers and homotrimers could be discerned in complete  
312 virions, placing class-II fusion protein intermediate structures that had been characterized as  
313 soluble, isolated components<sup>22; 27; 38</sup> into the context of active membrane fusion reactions involving  
314 intact particles and target membranes. Our cryo-ET analysis further corroborates the role of an

315 elongated form of E1-HT where its domain III has yet to fold back against the homotrimer core<sup>27</sup>.  
316 This elongated E1-HT state is somewhat analogous to the extended prehairpin intermediate  
317 conformations proposed for class-I fusion proteins<sup>42; 43</sup>. However, there is no evidence to date that  
318 extended pre-hairpin class-I trimers project into the target membrane as we observed with the  
319 CHIKV E1 proteins.

320         Folding back of E1 domain III leads to colocalization of the E1 membrane anchor and its  
321 FL on the same end of the protein leading to juxtaposition of viral and target membranes.  
322 Supporting this notion, in our data, we first observe presence of a shortened E1-homotrimer  
323 confirmation at the hemifusion stage, suggestive of E1-domain III fold-back and formation of the  
324 post-fusion E1 conformation. In previous cryo-ET studies of class-I fusion proteins, the extended  
325 intermediate of the glycoprotein trimer bends upon itself to bring the target membrane close to the  
326 viral membrane, leading to localized dimpling of the target membrane as it is drawn towards the  
327 viral membrane<sup>28; 29</sup>. That no such dimples were observed at any point in CHIKV class-II fusion  
328 pathway indicates that there are more pathways to effect protein-mediated membrane fusion than  
329 previously appreciated. In contrast, the extended, tightly docked membrane interfaces as seen in  
330 CHIKV (Figure 4j,k) have been observed during influenza virus<sup>29</sup> as well as SNARE-mediated<sup>38</sup>  
331 membrane fusion reactions. These observations underscore the generality of this membrane  
332 reorganization stage, indicating its role as an obligate intermediate state and highlighting its  
333 significance in protein-mediated membrane fusion reactions.

334         Once membrane apposition occurs, the CHIKV nucleocapsid detaches from the internal  
335 side of the viral membrane. This is likely necessary to provide fluidity to the viral membrane.  
336 Similar disintegration of matrix layers in influenza virus membrane fusion precede fusion pore  
337 formation<sup>30</sup>. In our study, we also observed that under optimal fusion pH conditions, the CHIKV

338 virions, including its NC, lose their icosahedral nature. Furthermore, we observed slight expansion  
339 of the glycoprotein shell in the low pH-exposed CHIKV, consistent with reports for Semliki-forest  
340 virus at mildly acidic pH<sup>44</sup>. It is possible that acid-induced conformational changes in the surface  
341 glycoproteins are transmitted through the viral membrane to weaken the E2 glycoprotein's  
342 cytoplasmic tail interaction with the NC<sup>45</sup>. Loss of interaction between the external glycoproteins  
343 and NC allows the glycoproteins to diffuse freely on the viral membrane, which enables direct  
344 interaction between the opposing membranes during the fusion process as is seen in our study  
345 (Figure 4). Changes in interaction between the E2's cytoplasmic tail and NC has been implicated  
346 in causing structural changes in the NC<sup>46</sup>. Alternatively, ion leakage across the viral membrane  
347 either via the 6K protein<sup>47</sup> or the E1 protein<sup>48</sup> may permit acidification of the virus interior. It is  
348 possible that both the conformational changes in the glycoproteins and acidification of the virus  
349 interior mutually influence the NC structure. The present data, however, does not allow us to  
350 distinguish between the two possible mechanisms. Nevertheless, it is clear that the pH-dependent  
351 surface glycoprotein-NC protein interaction plays a key regulatory role in the alphavirus fusion  
352 system, much like the HA-matrix protein interactions observed in influenza virus<sup>30</sup>. This suggests  
353 that coordinated changes between the primary fusion protein and other structural proteins in  
354 enveloped viruses are a common phenomenon that likely help govern the sequence of membrane  
355 fusion events.

356         One key observation regarding lipidic intermediates relates to penultimate stages of  
357 membrane remodeling leading up to fusion pore opening. Notably, we observed several examples  
358 of hemifused diaphragms in our data. As the time-dependent evolution of intermediate populations  
359 shows (Figure 6a), a low fraction of hemifused complexes remain constant over time, even as  
360 examples of post-fusion complexes increase substantially. These observations suggest that

361 hemifusion might represent a rate-limiting step in the membrane fusion process, as hypothesized  
362 via fluorescence studies of CHIKV membrane fusion<sup>33</sup>. In Ca<sup>2+</sup> triggered membrane fusion  
363 reactions such as the SNARE-mediated systems, the hemifused configuration has been shown to  
364 embody a kinetically trapped state with productive fusion occurring instead through hemifusion-  
365 free point contacts<sup>49</sup>. In our cryo-ET data, we do not observe any examples that suggest an alternate  
366 hemifusion-free pathway, though it is possible that such alternate pathways occur too rapidly to be  
367 detected in our cryo-ET conditions.

368         The present study provides the most detailed characterization of a class-II protein-mediated  
369 membrane fusion process by resolving protein intermediates and non-canonical membrane  
370 configurations associated with protein remodeling. These results chart the molecular processes that  
371 alphaviruses and other class-II fusion virus systems such as flaviviruses, employ in order to deliver  
372 their genomes to initiate infection. With structural elucidation of these steps, it becomes possible  
373 to identify key stages for targeting by inhibitors with means to understand their mechanisms. For  
374 class-I fusion systems such as HIV, neutralizing antibodies have been described that bind to  
375 intermediate forms of its fusion proteins and can potentially arrest the fusion process<sup>50; 51</sup>. Few  
376 examples of antibodies that trap flaviviruses in an intermediate stage that prevents fusion have also  
377 been identified<sup>52; 53</sup>. With better understanding of the key structural stages in alphavirus membrane  
378 fusion, as probed in this work, it may be possible to develop better strategies to inhibit these  
379 viruses' fusion and entry. At a broader level, resolving the molecular processes of CHIKV fusion  
380 also advances our understanding of fundamental aspects in protein-mediated membrane fusion,  
381 which is an essential biological process involved not only in enveloped virus infection but also in  
382 cell-to-cell fusion, intracellular vesicle fusion, gamete fusion and synaptic vesicle signaling.

383

384 Main Figures and Legends:  
385

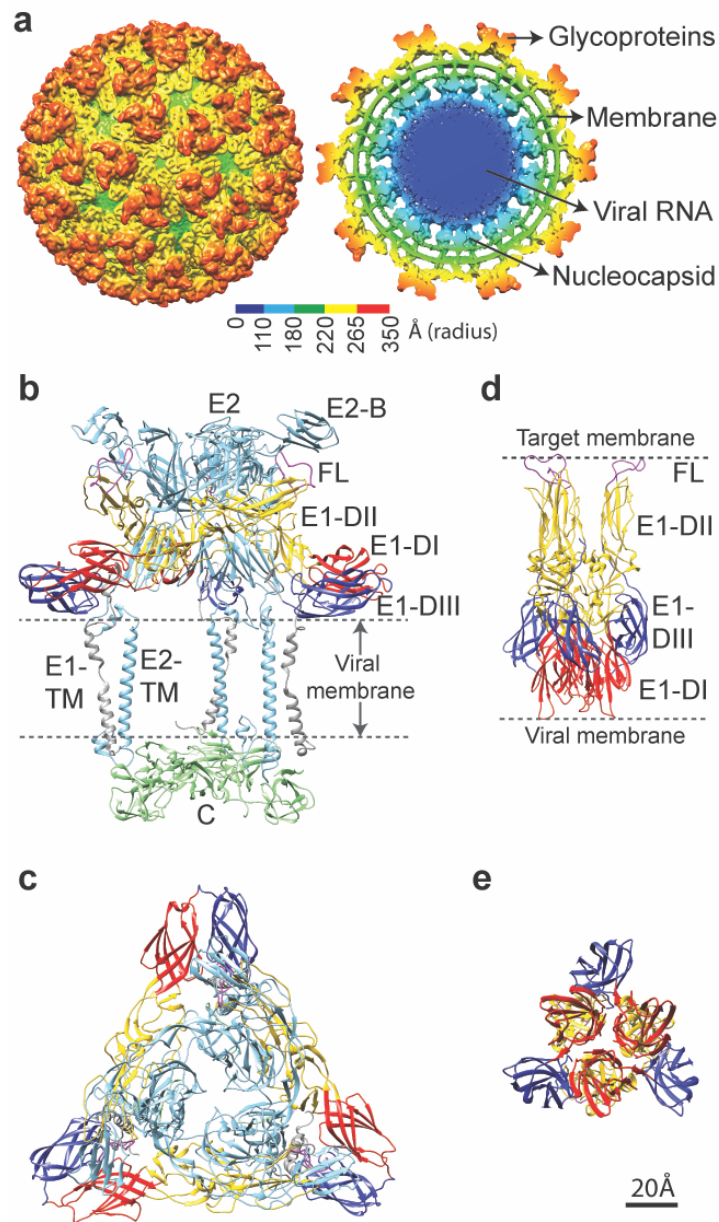

386

387 **Figure 1.** Structure of CHIKV particle. **a.** Surface view (left) and cross-sectional view (right) of  
388 UV-inactivated CHIKV strain S27. Cryo-EM density map is colored according to radius. **b.** Side  
389 view of ribbon structure of the trimeric surface glycoprotein heterodimers in contact with the inner  
390 capsid protein as observed in the wild-type virion (PDB ID: 3J2W). **c.** Top view of the trimeric  
391 E1-E2 heterodimers on wild-type CHIKV. **d and e.** Side and top view of the crystallographic

392 structure of post-fusion E1 homotrimers (PDB ID: 1RER) respectively. In all panels, E1 is colored  
393 according to domains (domain I: red, domain II: yellow, domain III: blue, FL: magenta, E1-  
394 transmembrane domain: grey), E2 is in light blue and capsid protein in green.

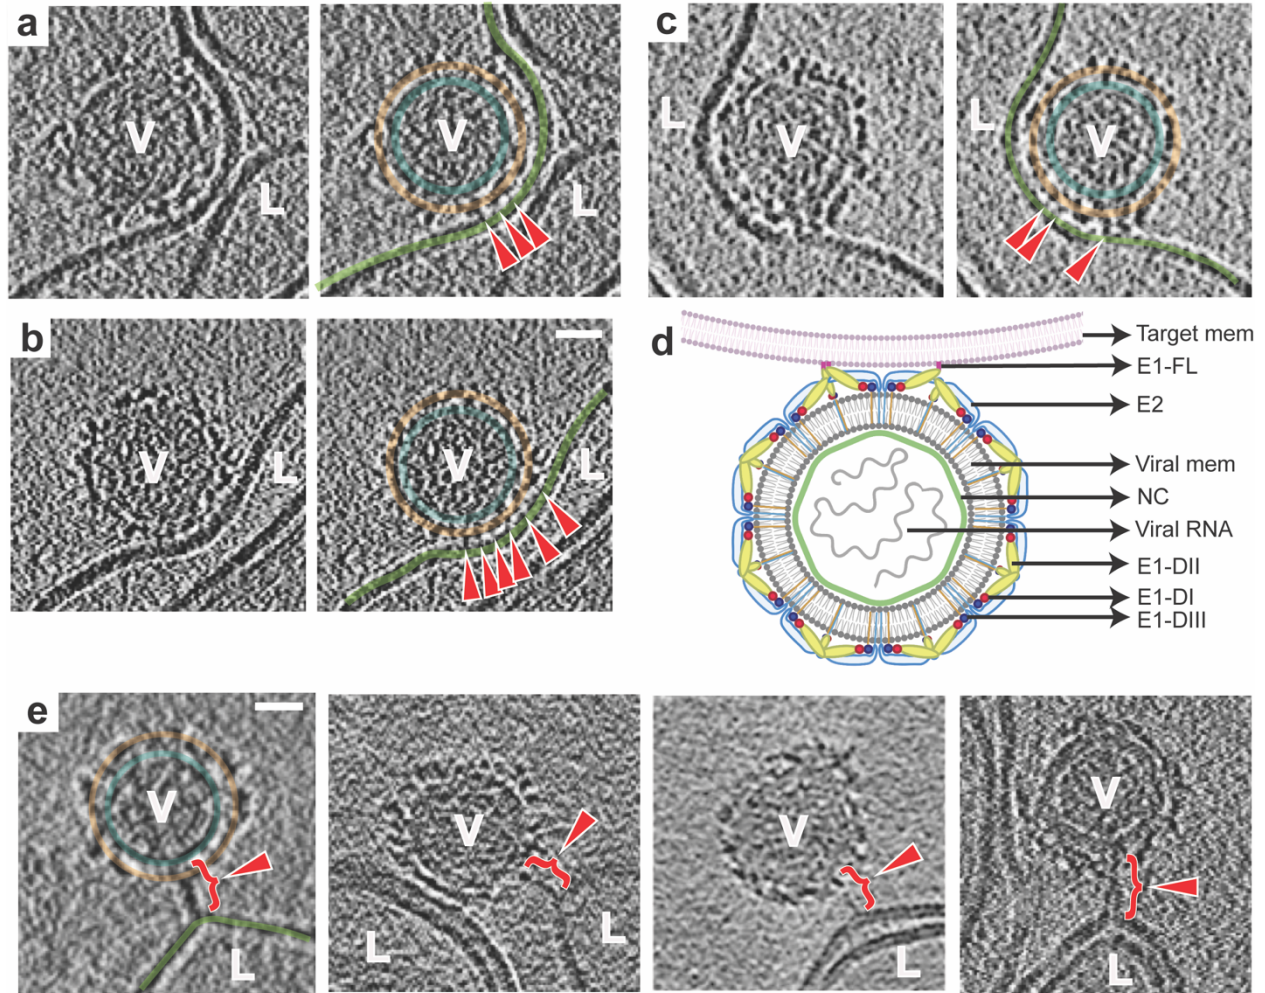

395

396

397

398

399

400

401

402

403

404

**Figure 2.** CHIKV membrane recruitment – stage I. **a-c.** Left panel: Tomogram slice showing CHIKV (V) interacting with liposome (L) via thin, delicate attachments. Right: Same tomogram slice as in the left panel but annotated to show the different protein and membrane layers: CHIKV glycoprotein layer in orange, CHIKV membrane in teal and liposome membrane in green. The attachments between CHIKV and liposome membrane are denoted by red arrowheads. **d.** Cartoon representation of this fusion stage. **e.** Tomogram slices showing examples of singular, long glycoprotein connection (red bracket with arrowhead) to liposome membrane. Leftmost panel alone is annotated similar to previous panels for reference. Scale bar is 200 Å in all panels. Black is high density in all panels.



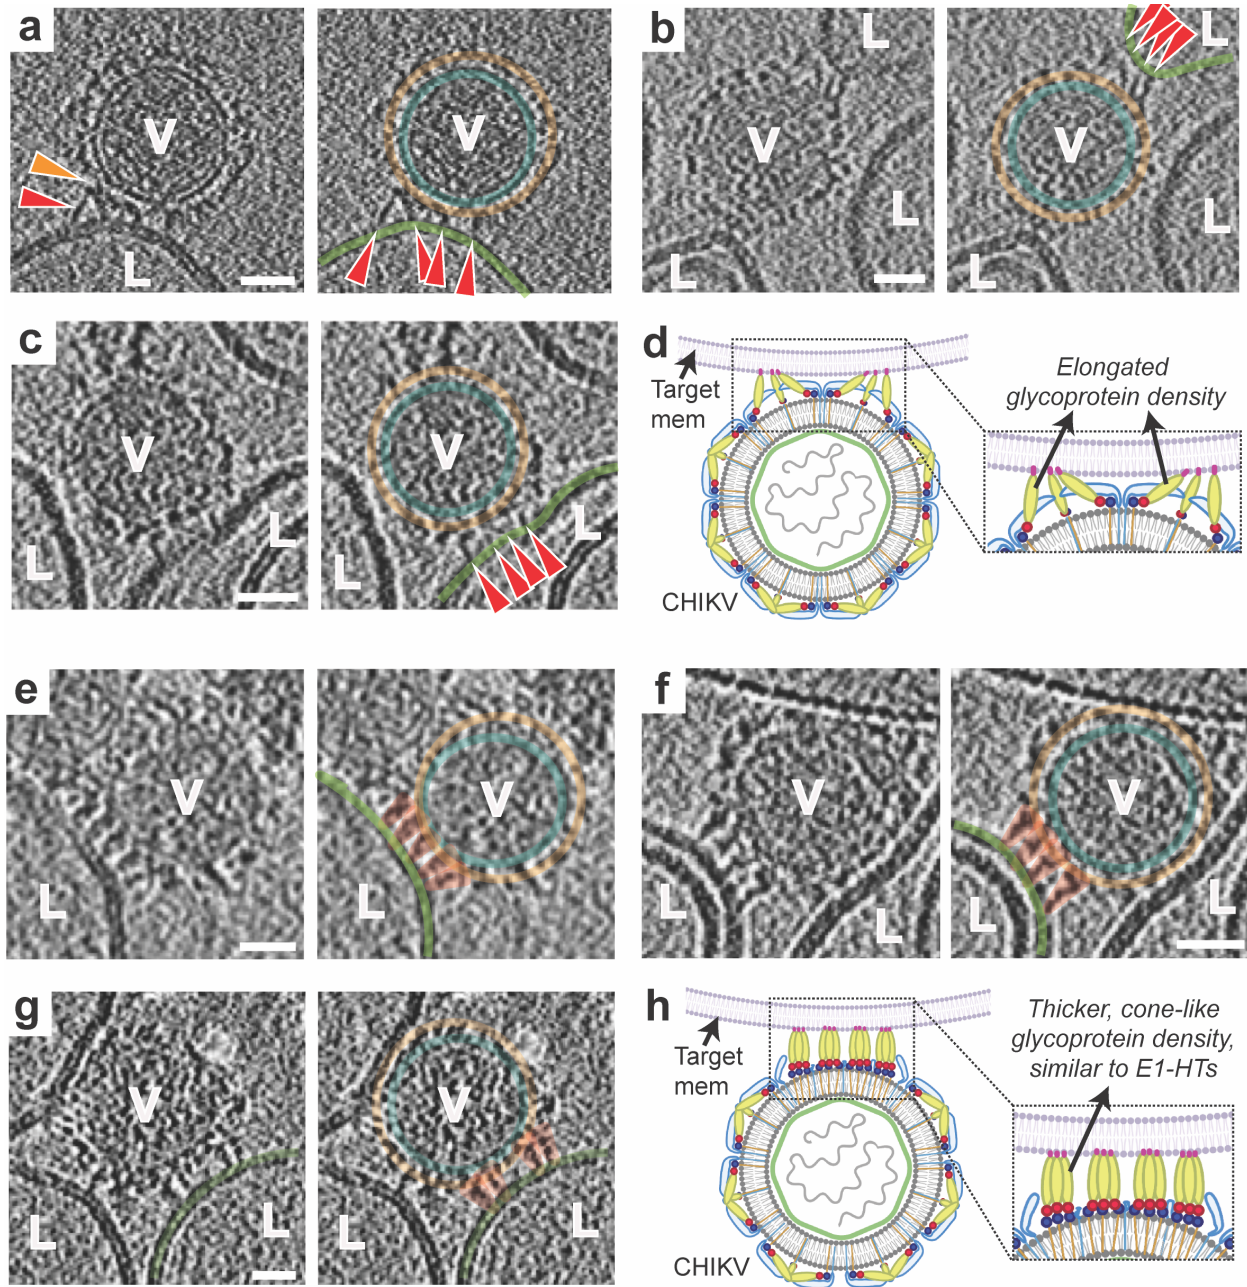

405

406 **Figure 3.** Glycoprotein membrane attachment and E1 homotrimer formation (stages II and III). **a-**

407 **c.** Stage II. Left panels: Tomogram slice showing long bridge-like attachments between CHIKV

408 (V) and liposomes (L). Red arrowhead indicates extended glycoprotein density and orange

409 arrowhead denotes remaining glycoprotein density close to the viral membrane surface. Right:

410 Same tomogram slice as in the left panels but annotated to show the different protein and

411 membrane layers. CHIKV glycoprotein layer in orange, CHIKV membrane in teal and liposome

412 membrane in green. Glycoprotein attachments between CHIKV and liposome membrane are  
413 denoted by red arrowheads. **d.** Cartoon representation of this fusion stage with zoomed inset  
414 showing the virus-target membrane interaction interface. **e-g.** Stage III. Similar representation as  
415 in a-c with left panels showing the raw tomogram slices and right panels showing the same slices  
416 with annotation. Cone-like glycoprotein densities that resemble E1-HTs are colored in orange. **h.**  
417 Cartoon representation of the E1-homotrimer formation stage with zoomed inset highlighting the  
418 region of interest. Scale bar is 200 Å and black is high density in all panels.

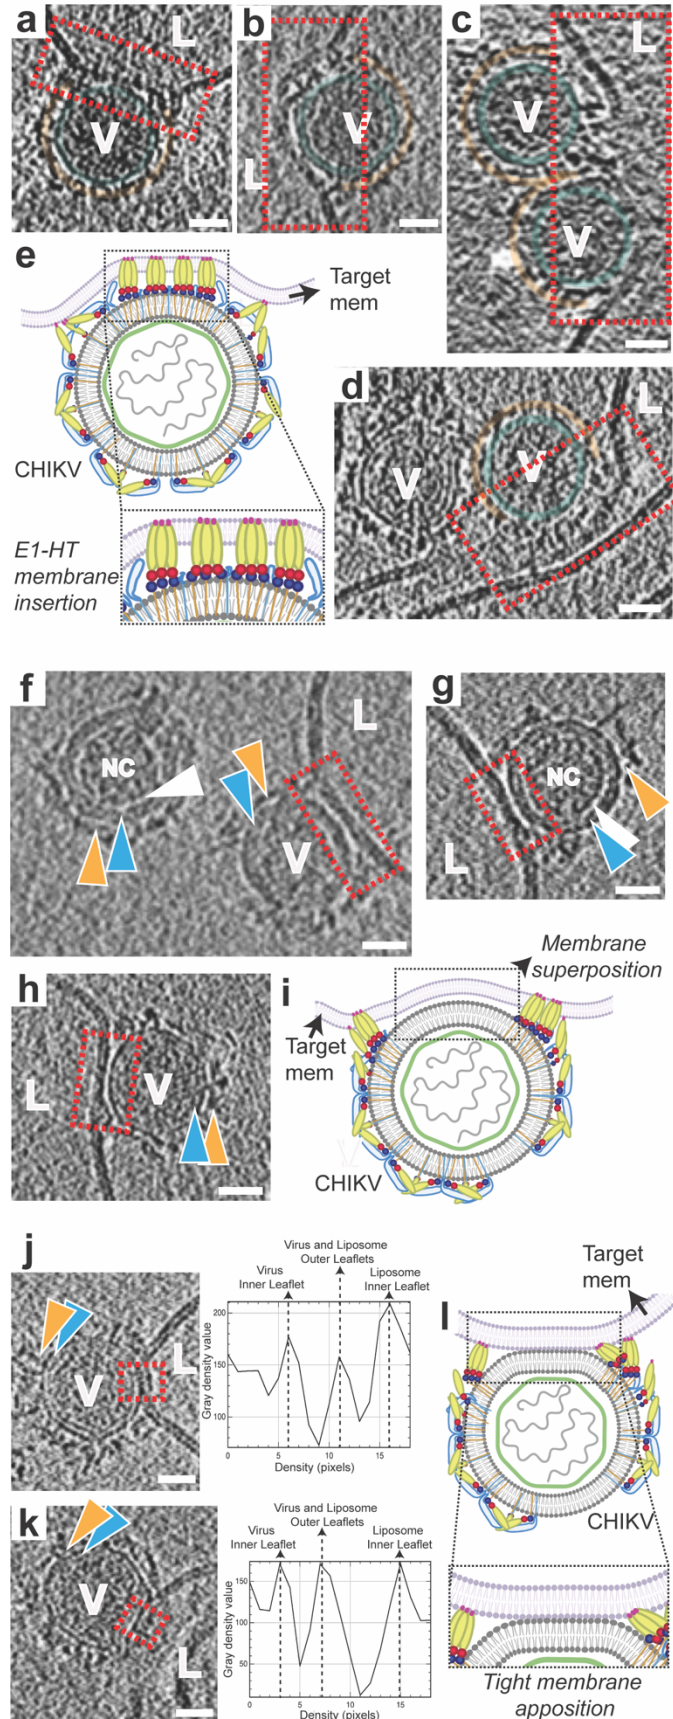

420 **Figure 4.** E1-HT membrane insertion and opposing membrane superposition (stages IV-VI). **A-d.**  
421 Annotated tomogram slices showing insertion of protein densities into the liposome (L) causing  
422 disruption of membrane density at the interface. CHIKV (V) are annotated similar to previous  
423 figures with red dotted rectangles enclosing interaction areas of interest. **e.** Cartoon representation  
424 of fusion stage IV – E1-HT membrane insertion. **f-h.** Tomogram slices showing superposition of  
425 the viral and liposome membranes. Interaction interfaces are enclosed in red rectangles. Variation  
426 and fluidity in the glycoprotein layer (orange triangles) can be seen in panels f,g. White triangles  
427 represent the gap observed between the NC and inner surface of the viral membrane (blue  
428 triangles). **i.** Cartoon representation of fusion stage V – membrane superposition, with dotted  
429 rectangle outlining the interface. **j-k.** Tomogram slices showing tightly docked membrane  
430 interfaces with the proximal leaflets too close to separate at the current tomogram resolution.  
431 Corresponding electron density plots along a line traversing the tight-membrane interface in the  
432 boxed region (red) of the tomogram slices are also shown. **l.** Cartoon representation of the tightly  
433 docked membrane interface (stage VI) with zoomed inset showing region of interest. Scale bar is  
434 200 Å and black is high density in all panels.



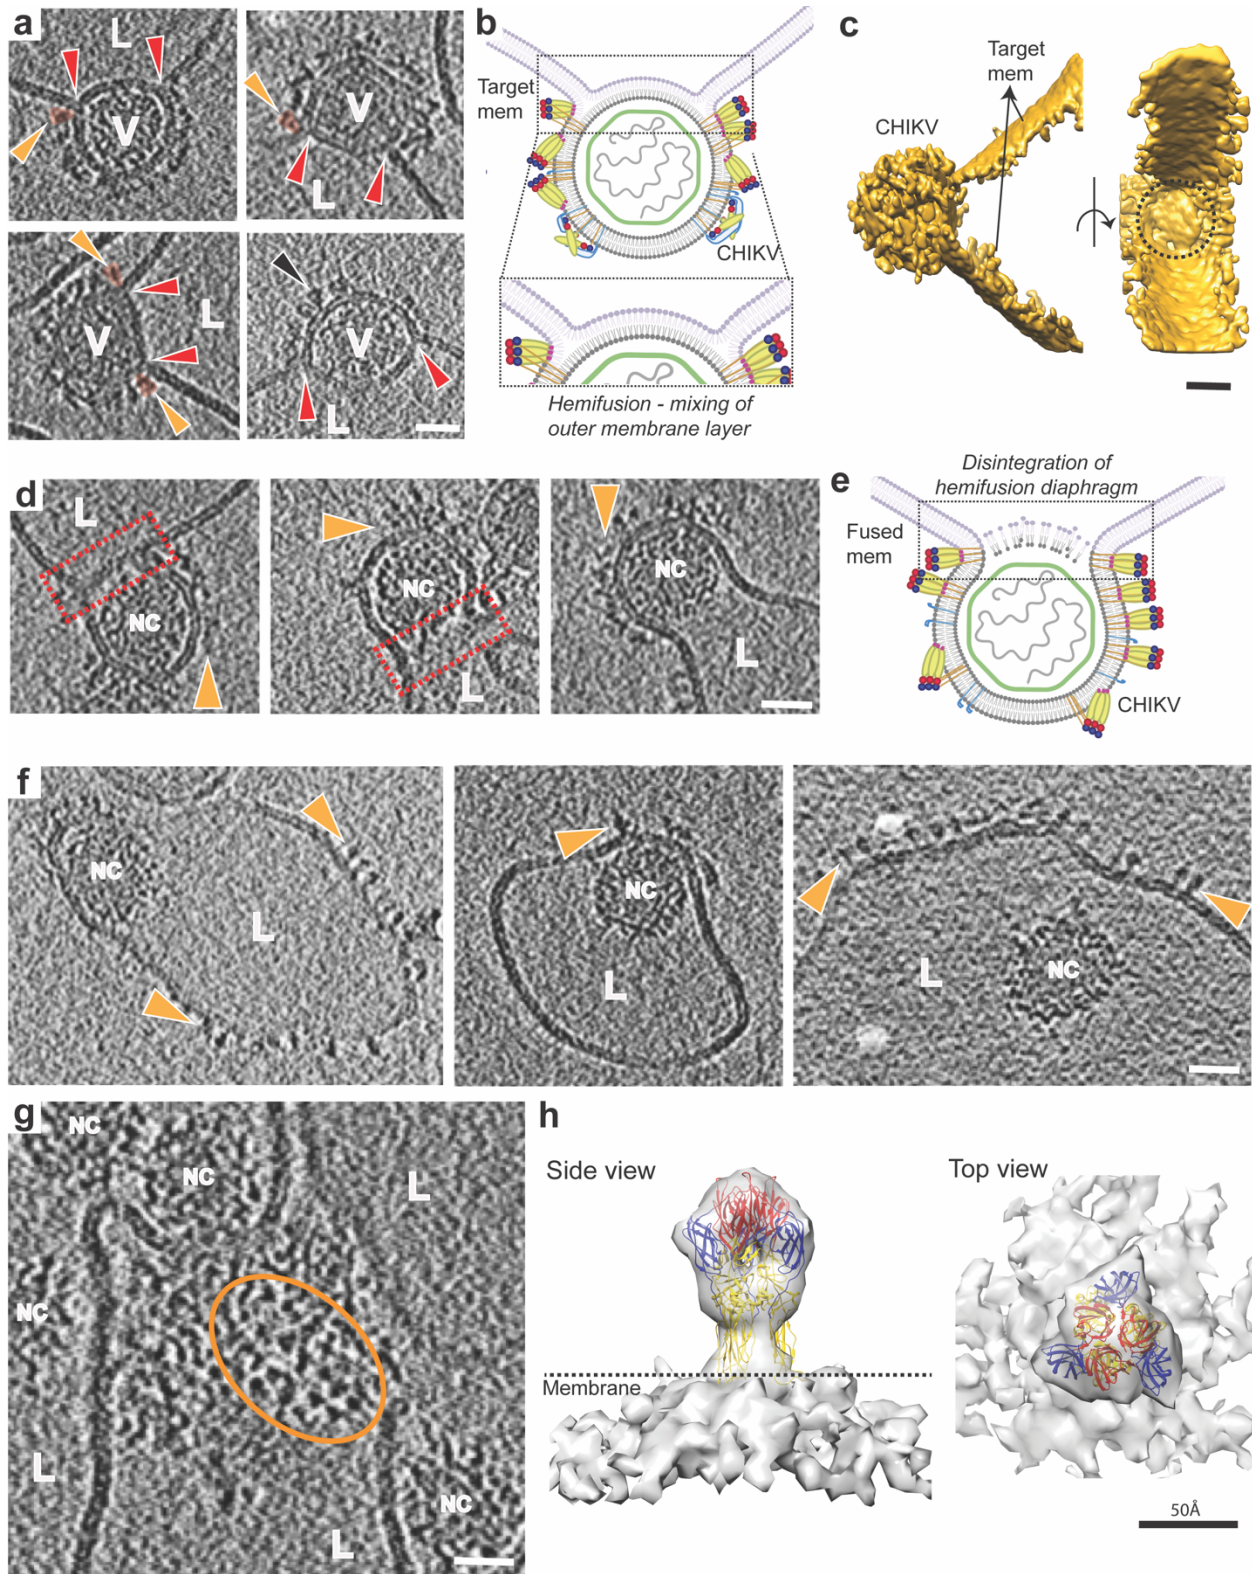

435

436 **Figure 5.** Membrane fusion stages VII -IX – hemifusion to nucleocapsid release. **a.** Tomogram

437 slices showing clear examples of hemifusion or mixing of membrane leaflets between CHIKV (V)

438 and liposomes (L). Red arrows indicate three-way junctions where the two membranes intersect.  
439 Orange arrows indicate glycoprotein density (also colored in orange) at the hemifusion junction  
440 that correspond to post-fusion E1 homotrimers. Black arrow shows presence of E1 homotrimers  
441 on virion membrane, suggesting that E1-FL can bind to viral membrane itself on availability. **b.**  
442 Cartoon representation of hemifusion with zoomed inset showing the region of mixing between  
443 the two outer leaflets. **c.** Surface 3D rendering of hemifused virion shown in bottom left of panel  
444 a. Side view (left) and 90° rotated view (right) is shown. The circular surface of hemifusion  
445 diaphragm can be seen (black dotted circle). **d.** Disintegration of the mixed central layer in the  
446 hemifused state leads to formation of a fusion pore. Fusion pore interface is shown as red  
447 rectangles and glycoproteins indicated as orange triangles. **e.** Cartoon representation of panel d. **f.**  
448 Subsequent release of the CHIKV nucleocapsid (NC) into the liposome lumen after fusion of the  
449 viral and liposome membranes. Floating glycoprotein densities on liposome surface are indicated  
450 in orange. **g.** Top view of a fused CHIKV showing triangle-shaped glycoprotein densities (orange  
451 oval) on the liposome surface. **h.** Sub-tomogram average of the glycoprotein densities seen in  
452 panels f and g, with the post-fusion E1-homotrimer crystal structure (PDB ID: 1RER) fitted into  
453 the density. Scale bar is 200 Å and black is high density in panels a-g.

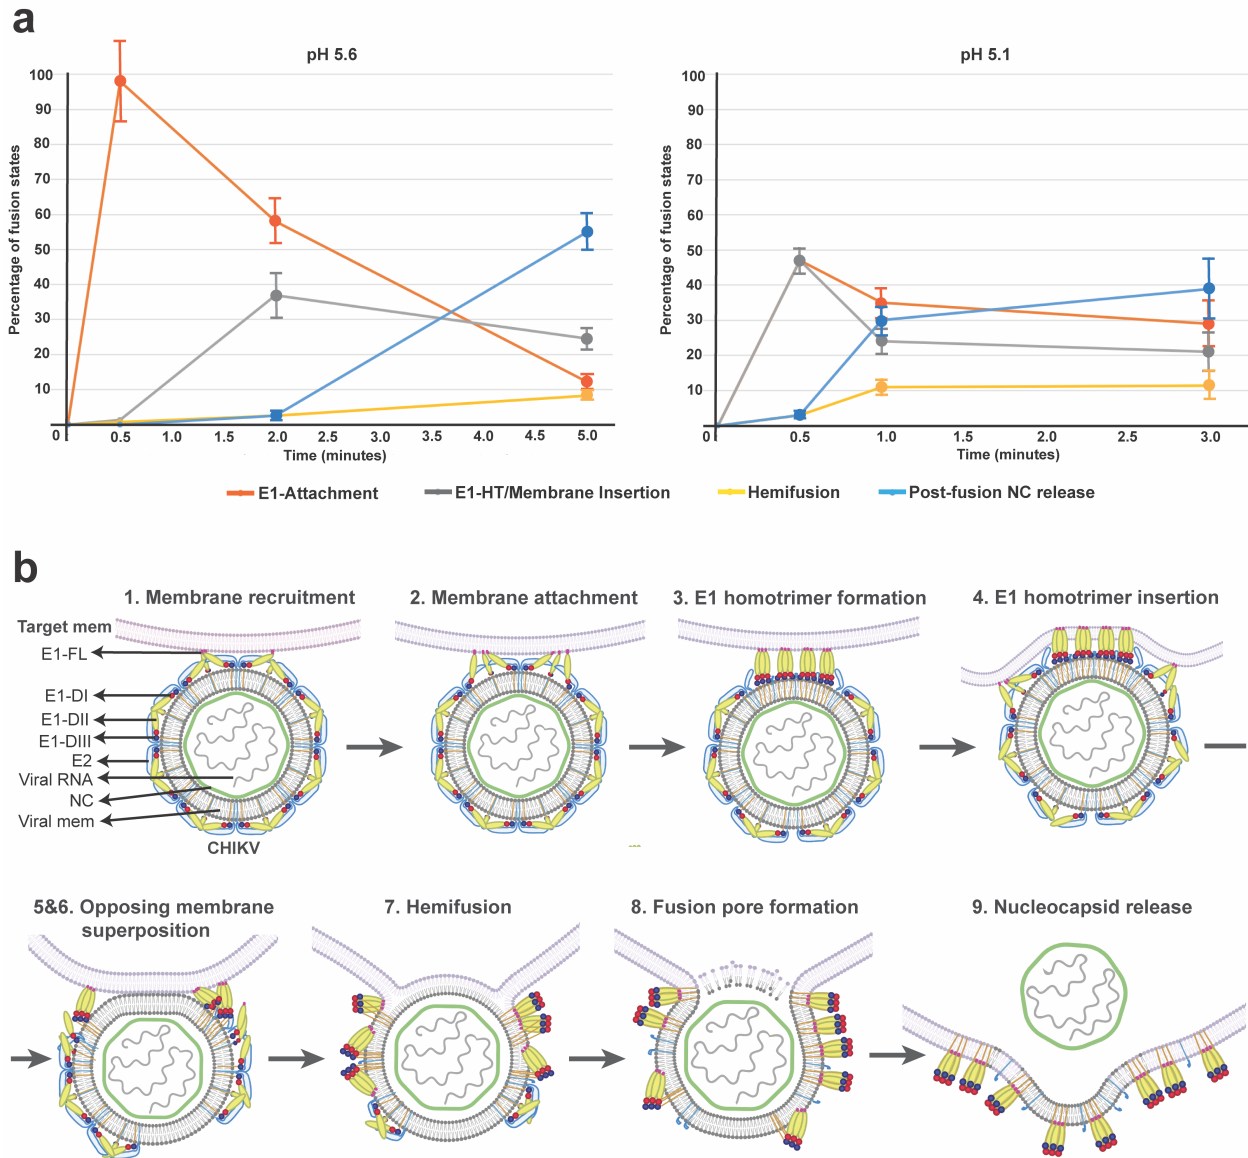

454

455 **Figure 6.** CHIKV membrane fusion pathway. **a.** Population of fusion-states during CHIKV  
 456 membrane fusion. For pH 5.6 (left) and pH 5.1 (right), percentage of each fusion-state was  
 457 calculated as a function of the total number of CHIKV-liposome contacts ( $n$ ) observed at that given  
 458 pH and timepoint. For pH 5.6,  $n=281$  and for pH 5.1,  $n=263$ . E1 attachment (red plot line) includes  
 459 stages I (membrane recruitment) and II (membrane attachment); E1-HT/Membrane Insertion (grey  
 460 plot line) includes stage III-VI: E1-HT formation, E1-HT membrane insertion, membrane  
 461 superposition and tight apposition; Hemifusion (yellow plot line) includes stages VII (Hemifusion)

462 and VIII (fusion pore formation); Post-fusion NC release (blue plot line) includes stage IX  
463 (nucleocapsids released into liposomal lumen). Individual population counts for each state are  
464 given in Supplemental Table 1. Error bars have been calculated as square root of the number of  
465 complexes observed for each fusion state at the given pH and timepoint, similar to previous  
466 report<sup>30</sup>. **b.** Cartoon schematic of CHIKV membrane fusion stages.



467 **Methods:**

468 CHIKV preparation and purification:

469 CHIKV strain S27 was propagated and purified similar to previous reports<sup>33</sup>. Briefly, BHK-21  
470 (Baby Hamster Kidney) cells were cultured at 37C and 5% CO2 in Dubelcco's minimal essential  
471 medium (DMEM) supplemented with 10% FBS (fetal bovine serum). Cells were infected with  
472 virus at m.o.i of 4.0 and virus particles allowed to infect for 1.5 hours. After 25-27 hours post-  
473 infection, the medium was collected, and virus particles were pelleted by ultracentrifugation for 2  
474 hours at 19000rpm in a Beckman Type 19 rotor at 4°C. The pelleted virus was resuspended  
475 overnight in HNE buffer (50mM HEPES, 150mM NaCl and 0.1mM EDTA), pH 7.4. The  
476 resuspended sample was applied to a sucrose gradient. The sucrose gradient was spun in an  
477 ultracentrifuge at 20,000rpm in a Beckman SW41 rotor overnight at 4°C. The virus band was  
478 extracted, inactivated by exposure to UV lamp, aliquoted and snap frozen in liquid nitrogen. Prior  
479 to experiments, inactivated CHIKV in 40% sucrose solution was dialyzed into HBS (10mM  
480 HEPES, 150mM NaCl, 50mM sodium citrate) buffer pH7.5, for 4-6 hours at 4°C.

481

482 Liposome preparation:

483 Liposomes composed of phosphatidyl choline (PC), phosphatidyl ethanolamine (PE),  
484 sphingomyelin and cholesterol (molar ratio 1:1:1:1.5) were prepared by lipid extrusion method  
485 described previously<sup>30;33</sup>. Stock solutions of the different components were prepared in chloroform  
486 and combined in appropriate ratios. The combined lipid solutions were dried under nitrogen gas.  
487 The lipid films were then resuspended in HBS (10mM HEPES, 150mM NaCl, 50mM sodium  
488 citrate (pH 7.5) and passed through five liquid nitrogen freeze-thaw cycles. For thaw cycles, water  
489 bath at 50°C was used. The resuspended solution was extruded 21 times through a 200-nm

490 polycarbonate membrane. All lipids and membrane were purchased from Avanti Polar Lipids. The  
491 resulting liposomes were passed over a PD-10 desalting column (GE Healthcare) and stored in pH  
492 6.0 HBS buffer.

493

494 Sample preparation and data collection for single particle cryo-EM:

495 Inactivated CHIKV in HBS buffer (pH 7.5) was applied to lacey carbon grids with a thin  
496 continuous carbon film (400 mesh) (Electron Microscopy Sciences). The grids were glow  
497 discharged (negative charge) under vacuum using 25mA current for 30 seconds. A 3 $\mu$ l aliquot of  
498 the sample was applied to these grids at 4°C and 100% humidity, blotted for 3seconds and  
499 immediately plunge frozen in liquid ethane using a Vitrobot Mark IV (FEI Co.).

500 Vitrified grids were imaged using a 300kV Titan Krios (FEI Co.) equipped with a K2  
501 Summit direct electron detector (Gatan Inc.) and post-specimen energy filter. Micrographs were  
502 collected at a nominal magnification of 105000X with a corresponding pixel size of 1.35 Å/pixel in  
503 counting mode. A dose rate of  $\sim 8$  e<sup>-</sup>/pixel/s was used with 200 ms exposure per frame and 50  
504 frames per image. Data was collected with a defocus range from 1.5 to 3.5  $\mu$ m. A total of 495  
505 micrographs were collected using the automated data collection software Legion<sup>54</sup>.

506

507 Single particle cryo-EM data processing and structure determination:

508 All data processing steps were carried out within the Relion software package<sup>55; 56</sup>. Frame  
509 alignment and dose-weighting was done using MotionCorr<sup>57</sup>. CTF estimation was performed  
510 using CTFFIND4<sup>58</sup>. A total of 7741 particles were picked automatically using 2D reference  
511 templates. Particles were extracted at 4x binning and the binned particle stack was used for  
512 unsupervised 2D classification. Further processing with 3D classification did not produce any

513 individually better class. A total of 5806 selected particles were thus used for 3D refinement with  
514 icosahedral symmetry imposed. Two initial models, a sphere and a low pass filtered reconstruction  
515 of CHIKV virus-like particle (EMD-5580), were used for separate 3D refinement runs. Both  
516 refinements converged to near identical structures of CHIKV. The particle stacks were unbinned  
517 progressively for further refinements. Map sharpening and post-processing was also carried out in  
518 Relion which gave a final structure with resolution 6.75 Å using the “gold-standard” FSC cutoff  
519 of 0.143.

520

521 Sample preparation for cryo-ET:

522 To make grids for cryo-ET, 400 mesh Lacey carbon grids with a layer of ultrathin carbon  
523 (Electron Microscopy Sciences) were glow discharged for 30 seconds. A 3µl aliquot of CHIKV  
524 sample was mixed with 10nm gold beads (Aurion BSA Gold Tracer 10nm) at a ratio of 15:1 (v/v).  
525 The sample was allowed to adsorb on the grid at room temperature for 15 seconds. Pre-calculated  
526 volumes of liposome mixture along with appropriate volume of HBS pH 3.0 were then added to  
527 the grids to drop the pH to desired values. Grids were then incubated at room temperatures for  
528 different time points inside a humidity-controlled chamber to avoid evaporation. Sample grids  
529 were then loaded onto a Vitrobot Mark IV (FEI Co.) at 4°C and 100% humidity, blotted for 7-  
530 8seconds and plunge frozen in liquid ethane.

531

532 Cryo-ET Data collection:

533 Frozen grids were imaged using a 300 kV Titan Krios with a Gatan K2 Summit direct  
534 electron detector and GIF energy filter with slit width of 20 eV. Tilt-series were collected in a  
535 dose-symmetric tilting scheme from -60° to +60° or from -54° to +54° with a step size of 3° using

536 Legimon<sup>54</sup> or SerialEM softwares<sup>59</sup>. Tilt-series were collected either in counting mode at a  
537 magnification of 81000X, corresponding to a pixel size of 1.69 Å per pixel or in super-resolution  
538 mode at a magnification of 53000X, corresponding to a pixel size of 0.8265 Å per pixel. The total  
539 dose per tilt series ranged between ~60-80 e<sup>-</sup>/Å<sup>2</sup>. A total of 441 tilt-series were collected across  
540 multiple sessions.

541

#### 542 Tomogram reconstruction:

543 Tilt-series image frames were corrected for electron beam-induced motion using  
544 Motioncor2<sup>57</sup>. Tilt images were then processed using batch tomography in IMOD<sup>60</sup> using standard  
545 procedures to generate 3-dimensional tomogram reconstructions. Tilt-series images were aligned  
546 using the gold bead markers. The aligned images were then reconstructed to give a 3D volume  
547 using weighted back-projection. The final tomograms were binned, low pass-filtered and contrast  
548 enhanced in ImageJ for visualization<sup>61</sup>. Supplemental tomogram movies were also made using  
549 ImageJ with pixel size in direction perpendicular to electron beam (x-y direction) being 10.14  
550 Å/pixel and 50.7 Å/pixel in the direction of the electron beam (z-direction). Volumes were  
551 rendered in 3D using UCSF Chimera<sup>62</sup>.

552

#### 553 Sub-tomogram averaging:

##### 554 Low pH CHIKV virions and post-fusion nucleocapsids:

555 Tilt-series from pH 5.9, 5.1 and 5.1 at 30 seconds to 1 minute timepoints were imported  
556 into EMAN2's sub-tomogram averaging pipeline<sup>63</sup>. 1k X 1k tomograms were generated within  
557 EMAN2 using default parameters. A total of 70 unattached or mildly attached virus particles were  
558 picked manually in the e2spt\_boxer.py interface<sup>63</sup>. Sub-volumes were extracted at 8xbinning

559 corresponding to a pixel size of 6.612 Å per pixel. Sub-tomogram alignment and refinement was  
560 carried using a spherical mask that covers an entire virus particle. A ring mask that encompasses  
561 only the outer glycoprotein shell and membrane was also tried. Different initial models, low pass  
562 filtered sphere map or CHIKV map or initial model generated within EMAN2 using stochastic  
563 gradient descent principle, were used as separate starting points. In all the cases, the output map  
564 did not converge to any with interpretable density features. A smaller radius mask covering only  
565 the nucleocapsid region was also attempted to check if the nucleocapsid in low pH CHIKV virions  
566 retained its neutral-pH structure. These attempts also failed to give any interpretable density map  
567 structure. Using EMAN2 tools, 2D radial density average plot of the sub-tomogram averaged  
568 CHIKV virion map was calculated for analysis.

569 A similar protocol as above was used for calculating the post-fusion nucleocapsid structure.  
570 Tilt-series from later fusion timepoints were imported into the EMAN2 pipeline. Nucleocapsids  
571 released into the liposome lumen were manually picked in the e2spt\_boxer.py interface <sup>63</sup>. A total  
572 of 122 sub-volumes that appeared reasonably spherical were extracted at 8xbinning corresponding  
573 to a pixel size of 6.612 Å per pixel. A spherical mask covering the entire nucleocapsid particle was  
574 used. Different initial models, low pass filtered sphere map or CHIKV nucleocapsid structure or  
575 initial model generated within EMAN2 using stochastic gradient descent principle, were used as  
576 separate starting points. In all cases, the output map did not converge to any interpretable density  
577 features.

578

#### 579 Post-fusion E1 glycoprotein:

580 A total of 40 tomograms from late time-points that contained fused virions with  
581 distinguishable protein features on the external surface of liposomes were selected. Ctf-estimation

582 for the tilt-series was carried out in EMAN2<sup>63</sup> and ctf-correction applied using ctfplotter in  
583 IMOD<sup>64</sup>. Protein spikes on surface of liposomes were picked manually in 3d-mod<sup>65</sup>. Each protein  
584 unit was identified using two points, with first point placed distal to the membrane and the second  
585 point placed at the protein end close to the membrane. Using these points, motive lists with  
586 coordinate positions and rotation angles with respect to the designated 'y' axis of the tomogram  
587 was calculated for each particle using the 'stalkInit' program within the PEET software suite<sup>66</sup>. A  
588 total of 591 protein spikes were picked. Subsequent sub-tomogram volume extraction, alignment  
589 and averaging was also carried out within PEET using binned data corresponding to pixel size of  
590 6.612 Å per pixel. A soft cylindrical mask that contained the protein spike and outer membrane  
591 layer was used. Search parameters allowed for a complete 360° search along the long axis of the  
592 protein spikes but restricted the search in the other two directions to ±60° with 0° being the long  
593 axis of the protein spikes. Initial coarse searches were followed by progressively finer search  
594 parameters. Duplicate removal was enabled to weed out overlapping volumes. Two initial models  
595 were tested -- a randomly selected sub-volume and a generated map of the post-fusion E1  
596 glycoprotein trimer structure from Semliki Forest virus (low pass filtered to 60Å). Missing wedge  
597 compensation was also applied within PEET during the alignment and averaging process. After  
598 initial alignment and averaging using standard averaging parameters as suggested by the PEET  
599 tutorials, the output sub-tomogram averages from the jobs with different initial models had similar  
600 structures. No symmetry was imposed in the initial steps. In the output sub-tomogram average of  
601 the spike using all particles, 3-fold symmetry was observed along the long axis of the spike. The  
602 dataset was spilt into even and odd datasets and averaged separately. Three-fold symmetry was  
603 applied during the averaging routine to give a final density map of resolution of 27.2 Å at 0.5 FSC

604 cut-off. Crystal structure of the Semliki Forest virus post-fusion E1 glycoprotein trimer (PDB:  
605 1RER) was fitted into the map density using UCSF Chimera.

606

607

608 **Acknowledgements:**

609 We thank the University of Washington Arnold and Mabel Beckman Cryo-EM for data collection  
610 time and support. A portion of this research was supported by NIH grant U24GM129547 and  
611 performed at the PNCC at Oregon Health and Science University (OHSU), a DOE Office of  
612 Science User Facility sponsored by the Office of Biological and Environmental Research, U.S.A.  
613 We also thank Dr. Mareike K. S. van Duijl-Richter, University of Groningen, Netherlands, for her  
614 help in virus production. This work was supported by NIH grant R01-GM099989 (KKL).

615

616 **Author Contributions:** V.M.P.: Conceptualization, Formal analysis, Investigation, Validation  
617 and Writing.; J.S.B.: Conceptualization, Resources.; J.M.S.: Resources, Writing review. K.K.L.:  
618 Conceptualization, Resources, Writing, Funding acquisition.

619

620 **Competing interests:** Authors declare no competing interests.

621

622 **Data Availability:** Sub-tomogram averaged density map of post-fusion E1 trimer with  
623 corresponding fitted atomic model has been deposited with accession codes EMD-XXXX and  
624 PDB ID XXXX.

625

626 **References:**

- 627 <sup>1</sup> SILVA, L. A.; DERMODY, T. S. Chikungunya virus: epidemiology, replication, disease  
628 mechanisms, and prospective intervention strategies. **J Clin Invest**, v. 127, n. 3, p. 737-  
629 749, Mar 01 2017. ISSN 1558-8238. Disponível em: <  
630 <https://www.ncbi.nlm.nih.gov/pubmed/28248203> >.  
631
- 632 <sup>2</sup> HAIDER, N. et al. Basic Reproduction Number of Chikungunya Virus Transmitted by  
633 Aedes Mosquitoes. **Emerg Infect Dis**, v. 26, n. 10, p. 2429-2431, 10 2020. ISSN 1080-  
634 6059. Disponível em: < <https://www.ncbi.nlm.nih.gov/pubmed/32946722> >.  
635
- 636 <sup>3</sup> R.J., K. **Togaviridae. In: Knipe DM, Howley PM, eds. *Fields Virology*** . Philadelphia,  
637 Pennsylvania, USA: Lippincott, Williams, and Wilkins: 629-650 p. 2013.  
638
- 639 <sup>4</sup> LWANDE, O. W. et al. Global emergence of Alphaviruses that cause arthritis in  
640 humans. **Infect Ecol Epidemiol**, v. 5, p. 29853, 2015. ISSN 2000-8686. Disponível em:  
641 < <https://www.ncbi.nlm.nih.gov/pubmed/26689654> >.  
642
- 643 <sup>5</sup> MAYER, S. V.; TESH, R. B.; VASILAKIS, N. The emergence of arthropod-borne viral  
644 diseases: A global prospective on dengue, chikungunya and zika fevers. **Acta Trop**, v.  
645 166, p. 155-163, Feb 2017. ISSN 1873-6254. Disponível em: <  
646 <https://www.ncbi.nlm.nih.gov/pubmed/27876643> >.  
647
- 648 <sup>6</sup> CUNHA, R. V. D.; TRINTA, K. S. Chikungunya virus: clinical aspects and treatment - A  
649 Review. **Mem Inst Oswaldo Cruz**, v. 112, n. 8, p. 523-531, Aug 2017. ISSN 1678-8060.  
650 Disponível em: < <https://www.ncbi.nlm.nih.gov/pubmed/28767976> >.  
651
- 652 <sup>7</sup> DUPUIS-MAGUIRAGA, L. et al. Chikungunya disease: infection-associated markers  
653 from the acute to the chronic phase of arbovirus-induced arthralgia. **PLoS Negl Trop**  
654 **Dis**, v. 6, n. 3, p. e1446, 2012. ISSN 1935-2735. Disponível em: <  
655 <https://www.ncbi.nlm.nih.gov/pubmed/22479654> >.  
656



- 657 8 PÉREZ-PÉREZ, M. J. et al. Chikungunya virus drug discovery: still a long way to go?  
658 **Expert Opin Drug Discov**, v. 14, n. 9, p. 855-866, 09 2019. ISSN 1746-045X.  
659 Disponível em: < <https://www.ncbi.nlm.nih.gov/pubmed/31177861> >.  
660
- 661 9 GAO, S.; SONG, S.; ZHANG, L. Recent Progress in Vaccine Development Against  
662 Chikungunya Virus. **Front Microbiol**, v. 10, p. 2881, 2019. ISSN 1664-302X.  
663 Disponível em: < <https://www.ncbi.nlm.nih.gov/pubmed/31921059> >.  
664
- 665 10 BUTTON, J. M. et al. Revisiting an old friend: new findings in alphavirus structure and  
666 assembly. **Curr Opin Virol**, v. 45, p. 25-33, 12 2020. ISSN 1879-6265. Disponível em:  
667 < <https://www.ncbi.nlm.nih.gov/pubmed/32683295> >.  
668
- 669 11 SUN, S. et al. Structural analyses at pseudo atomic resolution of Chikungunya virus and  
670 antibodies show mechanisms of neutralization. **Elife**, v. 2, p. e00435, Apr 2013. ISSN  
671 2050-084X. Disponível em: < <https://www.ncbi.nlm.nih.gov/pubmed/23577234> >.  
672
- 673 12 ZHANG, W. et al. Heparin binding sites on Ross River virus revealed by electron cryo-  
674 microscopy. **Virology**, v. 332, n. 2, p. 511-8, Feb 20 2005. ISSN 0042-6822. Disponível  
675 em: < <https://www.ncbi.nlm.nih.gov/pubmed/15680416> >.  
676
- 677 13 UBOL, S.; GRIFFIN, D. E. Identification of a putative alphavirus receptor on mouse  
678 neural cells. **J Virol**, v. 65, n. 12, p. 6913-21, Dec 1991. ISSN 0022-538X. Disponível  
679 em: < <https://www.ncbi.nlm.nih.gov/pubmed/1658382> >.  
680
- 681 14 TANG, J. et al. Molecular links between the E2 envelope glycoprotein and nucleocapsid  
682 core in Sindbis virus. **J Mol Biol**, v. 414, n. 3, p. 442-59, Dec 02 2011. ISSN 1089-8638.  
683 Disponível em: < <https://www.ncbi.nlm.nih.gov/pubmed/22001018> >.  
684
- 685 15 WAHLBERG, J. M. et al. Membrane fusion of Semliki Forest virus involves  
686 homotrimers of the fusion protein. **J Virol**, v. 66, n. 12, p. 7309-18, Dec 1992. ISSN  
687 0022-538X. Disponível em: < <https://www.ncbi.nlm.nih.gov/pubmed/1433520> >.  
688

- 689 16 GIBBONS, D. L. et al. Multistep regulation of membrane insertion of the fusion peptide  
690 of Semliki Forest virus. **J Virol**, v. 78, n. 7, p. 3312-8, Apr 2004. ISSN 0022-538X.  
691 Disponível em: < <https://www.ncbi.nlm.nih.gov/pubmed/15016852> >.  
692
- 693 17 VOSS, J. E. et al. Glycoprotein organization of Chikungunya virus particles revealed by  
694 X-ray crystallography. **Nature**, v. 468, n. 7324, p. 709-12, Dec 02 2010. ISSN 1476-  
695 4687. Disponível em: < <https://www.ncbi.nlm.nih.gov/pubmed/21124458> >.  
696
- 697 18 HOORNWEG, T. E. et al. Dynamics of Chikungunya Virus Cell Entry Unraveled by  
698 Single-Virus Tracking in Living Cells. **J Virol**, v. 90, n. 9, p. 4745-4756, May 2016.  
699 ISSN 1098-5514 (Electronic)  
700 0022-538X (Linking). Disponível em: < <https://www.ncbi.nlm.nih.gov/pubmed/26912616> >.  
701
- 702 19 BASORE, K. et al. Cryo-EM Structure of Chikungunya Virus in Complex with the  
703 Mxra8 Receptor. **Cell**, v. 177, n. 7, p. 1725-1737.e16, 06 2019. ISSN 1097-4172.  
704 Disponível em: < <https://www.ncbi.nlm.nih.gov/pubmed/31080061> >.  
705
- 706 20 KLIMSTRA, W. B. et al. DC-SIGN and L-SIGN can act as attachment receptors for  
707 alphaviruses and distinguish between mosquito cell- and mammalian cell-derived viruses.  
708 **J Virol**, v. 77, n. 22, p. 12022-32, Nov 2003. ISSN 0022-538X. Disponível em: <  
709 <https://www.ncbi.nlm.nih.gov/pubmed/14581539> >.  
710
- 711 21 WAHLBERG, J. M.; GAROFF, H. Membrane fusion process of Semliki Forest virus. I:  
712 Low pH-induced rearrangement in spike protein quaternary structure precedes virus  
713 penetration into cells. **J Cell Biol**, v. 116, n. 2, p. 339-48, Jan 1992. ISSN 0021-9525.  
714 Disponível em: < <https://www.ncbi.nlm.nih.gov/pubmed/1370493> >.  
715
- 716 22 GIBBONS, D. L. et al. Conformational change and protein-protein interactions of the  
717 fusion protein of Semliki Forest virus. **Nature**, v. 427, n. 6972, p. 320-5, Jan 22 2004.  
718 ISSN 1476-4687 (Electronic)  
719 0028-0836 (Linking). Disponível em: < <https://www.ncbi.nlm.nih.gov/pubmed/14737160> >.  
720
- 721 23 KLIMJACK, M. R.; JEFFREY, S.; KIELIAN, M. Membrane and protein interactions of  
722 a soluble form of the Semliki Forest virus fusion protein. **J Virol**, v. 68, n. 11, p. 6940-6,

- 723 Nov 1994. ISSN 0022-538X. Disponível em: <  
724 <https://www.ncbi.nlm.nih.gov/pubmed/7933075>>.  
725
- 726 <sup>24</sup> WENGLER, G.; WÜRKNER, D. Identification of a sequence element in the alphavirus  
727 core protein which mediates interaction of cores with ribosomes and the disassembly of  
728 cores. **Virology**, v. 191, n. 2, p. 880-8, Dec 1992. ISSN 0042-6822. Disponível em: <  
729 <https://www.ncbi.nlm.nih.gov/pubmed/1333127>>.  
730
- 731 <sup>25</sup> LANZREIN, M.; SCHLEGEL, A.; KEMPF, C. Entry and uncoating of enveloped  
732 viruses. **Biochem J**, v. 302 ( Pt 2), p. 313-20, Sep 1994. ISSN 0264-6021. Disponível  
733 em: < <https://www.ncbi.nlm.nih.gov/pubmed/8092981> >.  
734
- 735 <sup>26</sup> LESCAR, J. et al. The Fusion glycoprotein shell of Semliki Forest virus: an icosahedral  
736 assembly primed for fusogenic activation at endosomal pH. **Cell**, v. 105, n. 1, p. 137-48,  
737 Apr 2001. ISSN 0092-8674. Disponível em: <  
738 <https://www.ncbi.nlm.nih.gov/pubmed/11301009>>.  
739
- 740 <sup>27</sup> SANCHEZ-SAN MARTIN, C.; SOSA, H.; KIELIAN, M. A stable prefusion  
741 intermediate of the alphavirus fusion protein reveals critical features of class II membrane  
742 fusion. **Cell Host Microbe**, v. 4, n. 6, p. 600-8, Dec 11 2008. ISSN 1934-6069  
743 (Electronic)  
744 1931-3128 (Linking). Disponível em: < <https://www.ncbi.nlm.nih.gov/pubmed/19064260> >.  
745
- 746 <sup>28</sup> KIELIAN, M.; REY, F. A. Virus membrane-fusion proteins: more than one way to make  
747 a hairpin. **Nat Rev Microbiol**, v. 4, n. 1, p. 67-76, Jan 2006. ISSN 1740-1526.  
748 Disponível em: < <https://www.ncbi.nlm.nih.gov/pubmed/16357862> >.  
749
- 750 <sup>29</sup> LEE, K. K. Architecture of a nascent viral fusion pore. **EMBO J**, v. 29, n. 7, p. 1299-  
751 311, Apr 7 2010. ISSN 1460-2075 (Electronic)  
752 0261-4189 (Linking).  
753
- 754 <sup>30</sup> GUI, L. et al. Visualization and Sequencing of Membrane Remodeling Leading to  
755 Influenza Virus Fusion. **J Virol**, v. 90, n. 15, p. 6948-6962, 08 2016. ISSN 1098-5514.  
756 Disponível em: < <https://www.ncbi.nlm.nih.gov/pubmed/27226364> >.

757

758 <sup>31</sup> CALDER, L. J.; ROSENTHAL, P. B. Cryomicroscopy provides structural snapshots of  
759 influenza virus membrane fusion. **Nat Struct Mol Biol**, v. 23, n. 9, p. 853-8, Sep 2016.  
760 ISSN 1545-9985 (Electronic)  
761 1545-9985 (Linking). Disponível em: < <https://www.ncbi.nlm.nih.gov/pubmed/27501535> >.  
762

763 <sup>32</sup> CHLANDA, P. et al. The hemifusion structure induced by influenza virus  
764 haemagglutinin is determined by physical properties of the target membranes. **Nat**  
765 **Microbiol**, v. 1, n. 6, p. 16050, Apr 18 2016. ISSN 2058-5276 (Electronic)  
766 2058-5276 (Linking). Disponível em: < <https://www.ncbi.nlm.nih.gov/pubmed/27572837> >.  
767

768 <sup>33</sup> VAN DUIJL-RICHTER, M. K. S. et al. Chikungunya virus fusion properties elucidated  
769 by single-particle and bulk approaches. **J Gen Virol**, v. 96, n. 8, p. 2122-2132, Aug 2015.  
770 ISSN 1465-2099 (Electronic)  
771 0022-1317 (Linking). Disponível em: < <https://www.ncbi.nlm.nih.gov/pubmed/25872739> >.  
772

773 <sup>34</sup> WAARTS, B. L.; BITTMAN, R.; WILSCHUT, J. Sphingolipid and cholesterol  
774 dependence of alphavirus membrane fusion. Lack of correlation with lipid raft formation  
775 in target liposomes. **J Biol Chem**, v. 277, n. 41, p. 38141-7, Oct 2002. ISSN 0021-9258.  
776 Disponível em: < <https://www.ncbi.nlm.nih.gov/pubmed/12138173> >.  
777

778 <sup>35</sup> SMIT, J. M.; BITTMAN, R.; WILSCHUT, J. Low-pH-dependent fusion of Sindbis virus  
779 with receptor-free cholesterol- and sphingolipid-containing liposomes. **J Virol**, v. 73, n.  
780 10, p. 8476-84, Oct 1999. ISSN 0022-538X. Disponível em: <  
781 <https://www.ncbi.nlm.nih.gov/pubmed/10482600> >.  
782

783 <sup>36</sup> LI, L. et al. Structural changes of envelope proteins during alphavirus fusion. **Nature**, v.  
784 468, n. 7324, p. 705-8, Dec 2 2010. ISSN 1476-4687 (Electronic)  
785 0028-0836 (Linking). Disponível em: < <https://www.ncbi.nlm.nih.gov/pubmed/21124457> >.  
786

787 <sup>37</sup> CAO, S.; ZHANG, W. Characterization of an early-stage fusion intermediate of Sindbis  
788 virus using cryoelectron microscopy. **Proc Natl Acad Sci U S A**, v. 110, n. 33, p. 13362-  
789 7, Aug 13 2013. ISSN 1091-6490 (Electronic)  
790 0027-8424 (Linking). Disponível em: < <https://www.ncbi.nlm.nih.gov/pubmed/23898184> >.

791

792 38 GIBBONS, D. L. et al. Visualization of the target-membrane-inserted fusion protein of  
793 Semliki Forest virus by combined electron microscopy and crystallography. **Cell**, v. 114,  
794 n. 5, p. 573-83, Sep 2003. ISSN 0092-8674. Disponível em: <  
795 <https://www.ncbi.nlm.nih.gov/pubmed/13678581> >.  
796

797 39 WITKOWSKA, A. et al. Tight docking of membranes before fusion represents a  
798 metastable state with unique properties. **Nat Commun**, v. 12, n. 1, p. 3606, Jun 14 2021.  
799 ISSN 2041-1723 (Electronic)  
800 2041-1723 (Linking). Disponível em: < <https://www.ncbi.nlm.nih.gov/pubmed/34127664> >.  
801

802 40 HARRISON, S. C. Viral membrane fusion. **Virology**, v. 479-480, p. 498-507, May 2015.  
803 ISSN 1096-0341. Disponível em: < <https://www.ncbi.nlm.nih.gov/pubmed/25866377> >.  
804

805 41 REY, F. A.; LOK, S. M. Common Features of Enveloped Viruses and Implications for  
806 Immunogen Design for Next-Generation Vaccines. **Cell**, v. 172, n. 6, p. 1319-1334, 03  
807 08 2018. ISSN 1097-4172. Disponível em: <  
808 <https://www.ncbi.nlm.nih.gov/pubmed/29522750> >.  
809

810 42 BENHAIM, M. A. et al. Structural monitoring of a transient intermediate in the  
811 hemagglutinin fusion machinery on influenza virions. **Sci Adv**, v. 6, n. 18, p. eaaz8822,  
812 May 2020. ISSN 2375-2548 (Electronic)  
813 2375-2548 (Linking). Disponível em: < <https://www.ncbi.nlm.nih.gov/pubmed/32494683> >.  
814

815 43 BENTON, D. J. et al. Structural transitions in influenza haemagglutinin at membrane  
816 fusion pH. **Nature**, v. 583, n. 7814, p. 150-153, Jul 2020. ISSN 1476-4687 (Electronic)  
817 0028-0836 (Linking). Disponível em: < <https://www.ncbi.nlm.nih.gov/pubmed/32461688> >.  
818

819 44 HAAG, L. et al. Acid-induced movements in the glycoprotein shell of an alphavirus turn  
820 the spikes into membrane fusion mode. **EMBO J**, v. 21, n. 17, p. 4402-10, Sep 2002.  
821 ISSN 0261-4189. Disponível em: < <https://www.ncbi.nlm.nih.gov/pubmed/12198142> >.  
822

- 823 45 JOSE, J. et al. Interactions of the cytoplasmic domain of Sindbis virus E2 with  
824 nucleocapsid cores promote alphavirus budding. **J Virol**, v. 86, n. 5, p. 2585-99, Mar  
825 2012. ISSN 1098-5514. Disponível em: <  
826 <https://www.ncbi.nlm.nih.gov/pubmed/22190727> >.  
827
- 828 46 LEE, S. et al. Identification of a protein binding site on the surface of the alphavirus  
829 nucleocapsid and its implication in virus assembly. **Structure**, v. 4, n. 5, p. 531-41, May  
830 15 1996. ISSN 0969-2126. Disponível em: <  
831 <https://www.ncbi.nlm.nih.gov/pubmed/8736552> >.  
832
- 833 47 MELTON, J. V. et al. Alphavirus 6K proteins form ion channels. **J Biol Chem**, v. 277,  
834 n. 49, p. 46923-31, Dec 06 2002. ISSN 0021-9258. Disponível em: <  
835 <https://www.ncbi.nlm.nih.gov/pubmed/12228229> >.  
836
- 837 48 WENGLER, G.; KOSCHINSKI, A.; DREYER, F. Entry of alphaviruses at the plasma  
838 membrane converts the viral surface proteins into an ion-permeable pore that can be  
839 detected by electrophysiological analyses of whole-cell membrane currents. **J Gen Virol**,  
840 v. 84, n. Pt 1, p. 173-181, Jan 2003. ISSN 0022-1317. Disponível em: <  
841 <https://www.ncbi.nlm.nih.gov/pubmed/12533714> >.  
842
- 843 49 DIAO, J. et al. Synaptic proteins promote calcium-triggered fast transition from point  
844 contact to full fusion. **Elife**, v. 1, p. e00109, Dec 13 2012. ISSN 2050-084X (Electronic)  
845 2050-084X (Linking). Disponível em: < <https://www.ncbi.nlm.nih.gov/pubmed/23240085> >.  
846
- 847 50 CAILLAT, C. et al. Structure of HIV-1 gp41 with its membrane anchors targeted by  
848 neutralizing antibodies. **Elife**, v. 10, 04 19 2021. ISSN 2050-084X. Disponível em: <  
849 <https://www.ncbi.nlm.nih.gov/pubmed/33871352> >.  
850
- 851 51 FREY, G. et al. A fusion-intermediate state of HIV-1 gp41 targeted by broadly  
852 neutralizing antibodies. **Proc Natl Acad Sci U S A**, v. 105, n. 10, p. 3739-44, Mar 11  
853 2008. ISSN 1091-6490 (Electronic)  
854 0027-8424 (Linking). Disponível em: < <https://www.ncbi.nlm.nih.gov/pubmed/18322015> >.  
855

- 856 52 KAUFMANN, B. et al. Capturing a flavivirus pre-fusion intermediate. **PLoS Pathog**, v.  
857 5, n. 11, p. e1000672, Nov 2009. ISSN 1553-7374. Disponível em: <  
858 <https://www.ncbi.nlm.nih.gov/pubmed/19956725> >.  
859
- 860 53 THOMPSON, B. S. et al. A therapeutic antibody against west nile virus neutralizes  
861 infection by blocking fusion within endosomes. **PLoS Pathog**, v. 5, n. 5, p. e1000453,  
862 May 2009. ISSN 1553-7374. Disponível em: <  
863 <https://www.ncbi.nlm.nih.gov/pubmed/19478866> >.  
864
- 865 54 CARRAGHER, B. et al. Legion: an automated system for acquisition of images from  
866 vitreous ice specimens. **J Struct Biol**, v. 132, n. 1, p. 33-45, Oct 2000. ISSN 1047-8477.  
867 Disponível em: < <https://www.ncbi.nlm.nih.gov/pubmed/11121305> >.  
868
- 869 55 SCHERES, S. H. RELION: implementation of a Bayesian approach to cryo-EM structure  
870 determination. **J Struct Biol**, v. 180, n. 3, p. 519-30, Dec 2012. ISSN 1095-8657.  
871 Disponível em: < <https://www.ncbi.nlm.nih.gov/pubmed/23000701> >.  
872
- 873 56 ZIVANOV, J. et al. New tools for automated high-resolution cryo-EM structure  
874 determination in RELION-3. **Elife**, v. 7, 11 09 2018. ISSN 2050-084X. Disponível em: <  
875 <https://www.ncbi.nlm.nih.gov/pubmed/30412051> >.  
876
- 877 57 ZHENG, S. Q. et al. MotionCor2: anisotropic correction of beam-induced motion for  
878 improved cryo-electron microscopy. **Nat Methods**, v. 14, n. 4, p. 331-332, 04 2017.  
879 ISSN 1548-7105. Disponível em: < <https://www.ncbi.nlm.nih.gov/pubmed/28250466> >.  
880
- 881 58 ROHOU, A.; GRIGORIEFF, N. CTFFIND4: Fast and accurate defocus estimation from  
882 electron micrographs. **J Struct Biol**, v. 192, n. 2, p. 216-21, Nov 2015. ISSN 1095-8657.  
883 Disponível em: < <https://www.ncbi.nlm.nih.gov/pubmed/26278980> >.  
884
- 885 59 MASTRONARDE, D. N. Automated electron microscope tomography using robust  
886 prediction of specimen movements. **J Struct Biol**, v. 152, n. 1, p. 36-51, Oct 2005. ISSN  
887 1047-8477 (Print)  
888 1047-8477 (Linking). Disponível em: < <https://www.ncbi.nlm.nih.gov/pubmed/16182563> >.  
889



- 890 60 MASTRONARDE, D. N.; HELD, S. R. Automated tilt series alignment and tomographic  
891 reconstruction in IMOD. **J Struct Biol**, v. 197, n. 2, p. 102-113, 02 2017. ISSN 1095-  
892 8657. Disponível em: < <https://www.ncbi.nlm.nih.gov/pubmed/27444392> >.  
893
- 894 61 SCHNEIDER, C. A.; RASBAND, W. S.; ELICEIRI, K. W. NIH Image to ImageJ: 25  
895 years of image analysis. **Nat Methods**, v. 9, n. 7, p. 671-5, Jul 2012. ISSN 1548-7105.  
896 Disponível em: < <https://www.ncbi.nlm.nih.gov/pubmed/22930834> >.  
897
- 898 62 PETTERSEN, E. F. et al. UCSF Chimera--a visualization system for exploratory  
899 research and analysis. **J Comput Chem**, v. 25, n. 13, p. 1605-12, Oct 2004. ISSN 0192-  
900 8651. Disponível em: < <https://www.ncbi.nlm.nih.gov/pubmed/15264254> >.  
901
- 902 63 CHEN, M. et al. A complete data processing workflow for cryo-ET and subtomogram  
903 averaging. **Nat Methods**, v. 16, n. 11, p. 1161-1168, 11 2019. ISSN 1548-7105.  
904 Disponível em: < <https://www.ncbi.nlm.nih.gov/pubmed/31611690> >.  
905
- 906 64 XIONG, Q. et al. CTF determination and correction for low dose tomographic tilt series.  
907 **J Struct Biol**, v. 168, n. 3, p. 378-87, Dec 2009. ISSN 1095-8657. Disponível em: <  
908 <https://www.ncbi.nlm.nih.gov/pubmed/19732834> >.  
909
- 910 65 KREMER, J. R.; MASTRONARDE, D. N.; MCINTOSH, J. R. Computer visualization  
911 of three-dimensional image data using IMOD. **J Struct Biol**, v. 116, n. 1, p. 71-6, 1996  
912 Jan-Feb 1996. ISSN 1047-8477. Disponível em: <  
913 <https://www.ncbi.nlm.nih.gov/pubmed/8742726> >.  
914
- 915 66 NICASTRO, D. et al. The molecular architecture of axonemes revealed by cryoelectron  
916 tomography. **Science**, v. 313, n. 5789, p. 944-8, Aug 2006. ISSN 1095-9203. Disponível  
917 em: < <https://www.ncbi.nlm.nih.gov/pubmed/16917055> >.  
918  
919
